# Supplementary material for: Enhancement of Electrochemical Detection of Gluten with Surface Modification Based on Molecularly Imprinted Polymers Combined with Superparamagnetic Iron Oxide Nanoparticles
Source: MDPI journal article supplement (doi:10.3390/polym14010091), 2021-12-27
Supplement: s1 [file s1]

Supporting information

# Enhancement of Electrochemical Detection of Gluten with Surface Modification Based on Molecularly Imprinted Polymers Combined with Superparamagnetic Iron Oxide Nanoparticles

Dalawan Limthin <sup>1</sup>, Piyawan Leepheng <sup>1</sup>, Annop Klamchuen <sup>2</sup> and Darinee Phromyothin <sup>1,\*</sup>

<sup>1</sup> College of Materials Innovation and Technology, King Mongkut's Institute of Technology Ladkrabang, Bangkok 10520, Thailand; 63607009@kmitl.ac.th (D.L.); mildpiyawan55@gmail.com (P.L.)

<sup>2</sup> National Nanotechnology Center, National Science and Technology Development Agency, Patumthani 12120, Thailand; annop@nanotec.or.th

\* Correspondence: darinee.ph@kmitl.ac.th

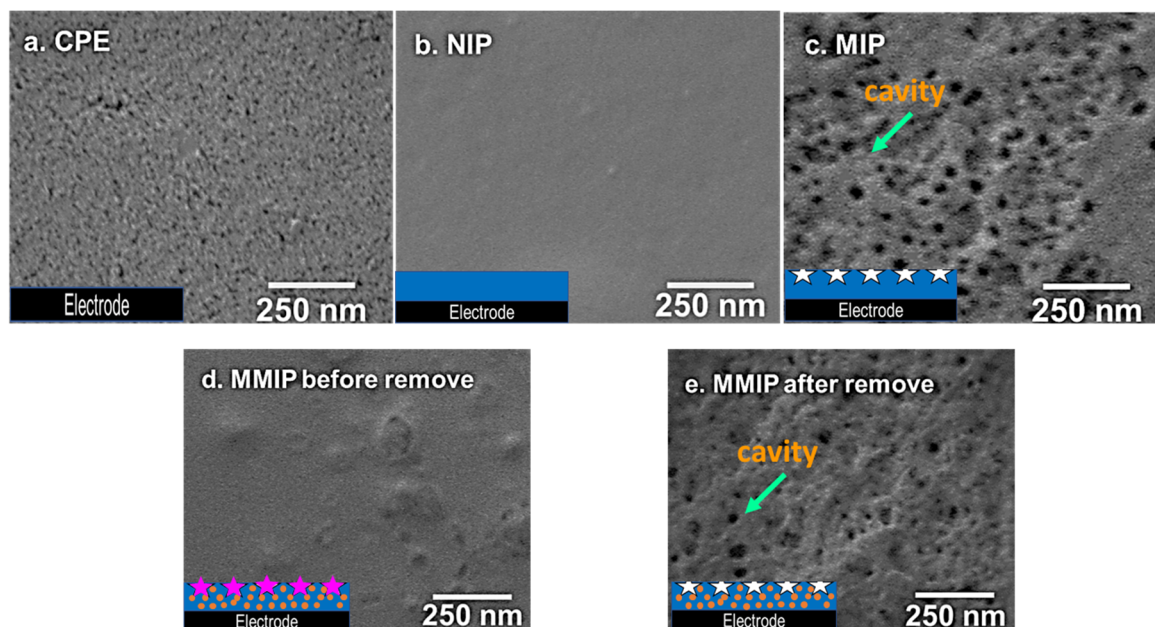

**Figure S1.** FESEM of surface-modified electrode consist of CPE, NIP, MIP, MMIP before and after remove.

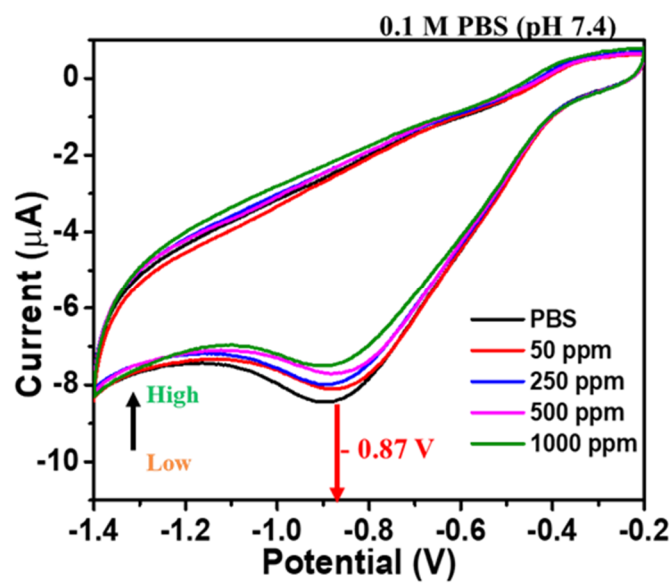

Figure S2. Cyclic voltammetry of MMIP modified electrode.

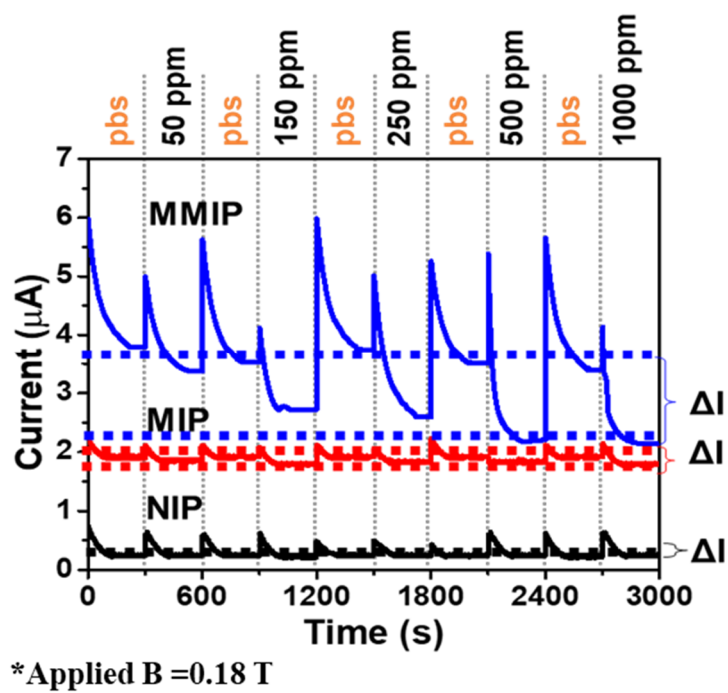

Figure S3. Amperometry of modified electrode.
